# Supplementary material for: Indium-modified copper nanocubes for syngas production by aqueous CO2 electroreduction
Source: Royal Society of Chemistry journal article supplement (doi:10.1039/d2dt00779g), 2022-01-01
Supplement: d2dt00779g1.pdf [file d2dt00779g1.pdf]

**Supporting Information to:**

**Indium-modified Copper nanocubes for syngas production from aqueous CO<sub>2</sub> electroreduction**

Alessandro Niorettini<sup>1</sup>, Raffaello Mazzaro<sup>2,3,\*</sup>, Fabiola Liscio<sup>3</sup>, Alessandro Kovtun<sup>4</sup>, Luca Pasquini<sup>2</sup>, Stefano Caramori<sup>1</sup>, Serena Berardi<sup>1,\*</sup>

<sup>1</sup> Department of Chemical, Pharmaceutical and Agricultural Sciences, University of Ferrara, Via Luigi Borsari 46, 44121 Ferrara, Italy.

<sup>2</sup> Department of Physics and Astronomy, University of Bologna, Via Bertini Pichat 6/2 Bologna, Italy.

<sup>3</sup> CNR-IMM, Via Piero Gobetti 101, Bologna, Italy.

<sup>4</sup> CNR-ISOF, Via Piero Gobetti 101, Bologna, Italy.

\* Corresponding author: [serena.berardi@unife.it](mailto:serena.berardi@unife.it)

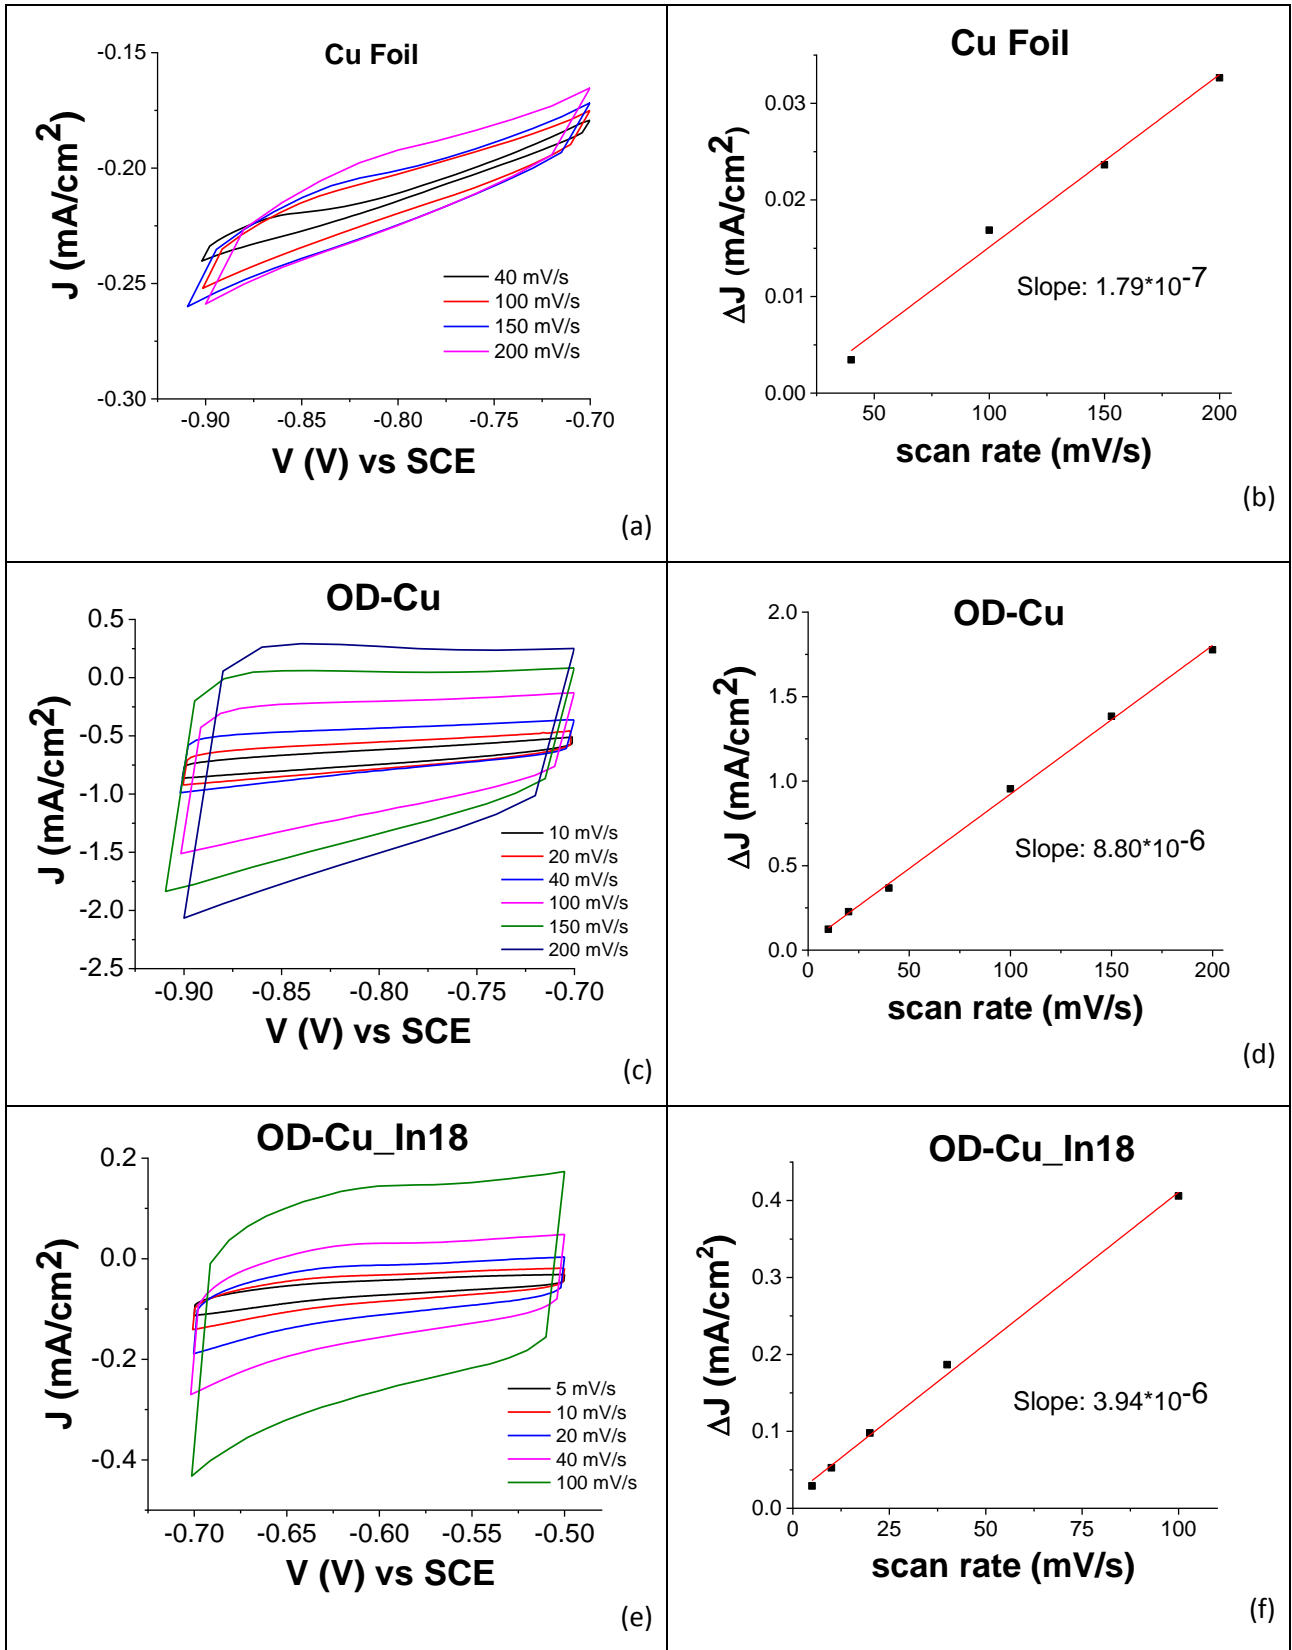

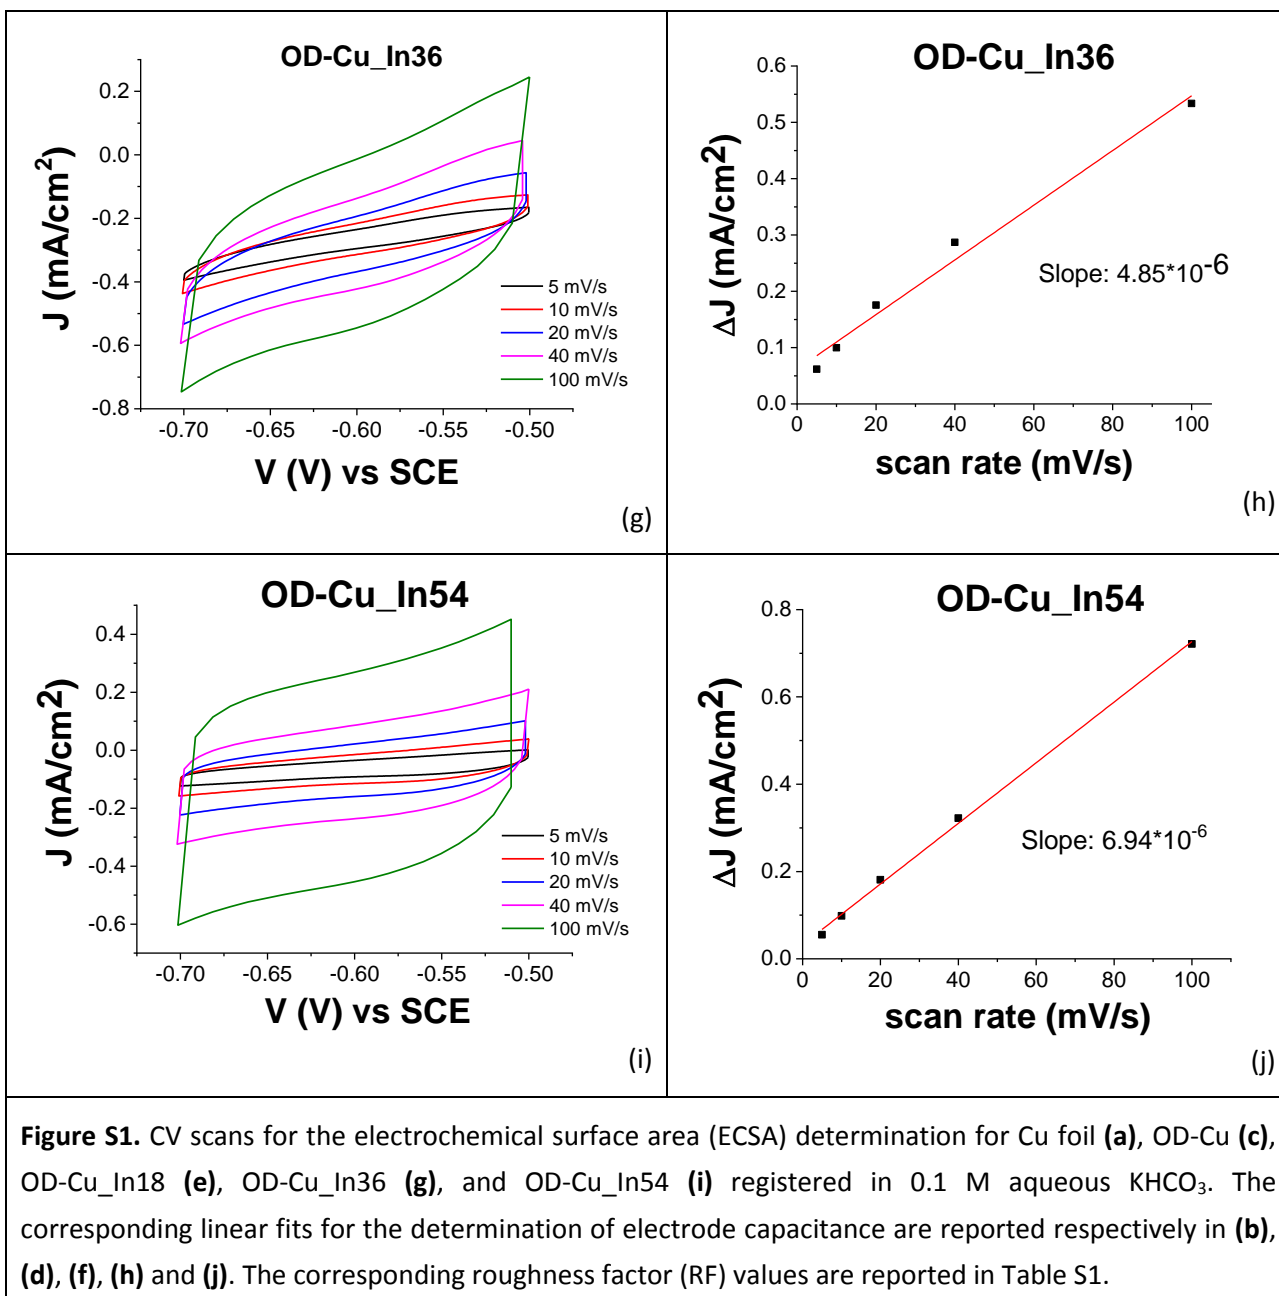

**Table S1.** Average values of the electrodes capacitance (*i.e.* the slope of the plots in Figure S1b, d, f, h and j) and the corresponding roughness factors.

| Electrode  | Capacitance ( $\mu\text{F}$ ) | Roughness Factor |
|------------|-------------------------------|------------------|
| Cu foil    | 0.179                         | 1                |
| OD-Cu      | 8.8                           | 50               |
| OD-Cu_In18 | 3.94                          | 22               |
| OD-Cu_In36 | 4.85                          | 27               |
| OD-Cu_In54 | 6.94                          | 39               |

### X-Ray Photoelectron Spectroscopy:

Atomic composition and binding energy of the main transition of OD-Cu, OD-Cu\_In36 and OD-Cu\_In36\_post are reported in Table S2.

**Table S2.** XPS atomic composition (at. %) of OD-Cu, OD-Cu\_In36 and OD-Cu\_In36\_post.

| Transition             | C 1s      | O 1s      | Cu 2p    | Cu 2p    | Cu 2p    | In 3d    | K 2p           |
|------------------------|-----------|-----------|----------|----------|----------|----------|----------------|
| Chemical state         | C-C       | various   | Cu(0)    | Cu(I)    | Cu(II)   | In(III)* | K <sup>+</sup> |
| Binding energy         | 285.1eV   | 532 eV    | 932.5eV  | 932.5eV  | 934.4 eV | 445.2eV  | 293.1eV        |
| <b>OD-Cu</b>           | 44.4 ±1.0 | 38.5 ±1.0 | -        | 7.1 ±0.3 | 0.7 ±0.2 | -        | 9.3 ±0.5       |
| <b>OD-Cu_In36</b>      | 43.8 ±1.0 | 51.2 ±1.0 | -        | 0.9 ±0.2 | 2.3 ±0.3 | 1.8 ±0.1 | -              |
| <b>OD-Cu_In36_post</b> | 53.0 ±1.0 | 32.0 ±0.5 | 2.8 ±0.4 | **       | 0.6 ±0.2 | 0.8 ±0.1 | 10.8 ±0.5      |

\* In 3d 5/2 presents a relative shift between OD-Cu\_In36 (445.2 eV) and OD-Cu\_In36\_post (444.9 eV), that corresponds to In(OH)<sub>3</sub> and In<sub>2</sub>O<sub>3</sub> respectively.

\*\* Metallic Cu(0) and Cu(I) present the same binding energy, only from Cu LMM signal is possible to qualitatively confirm the presence of both.

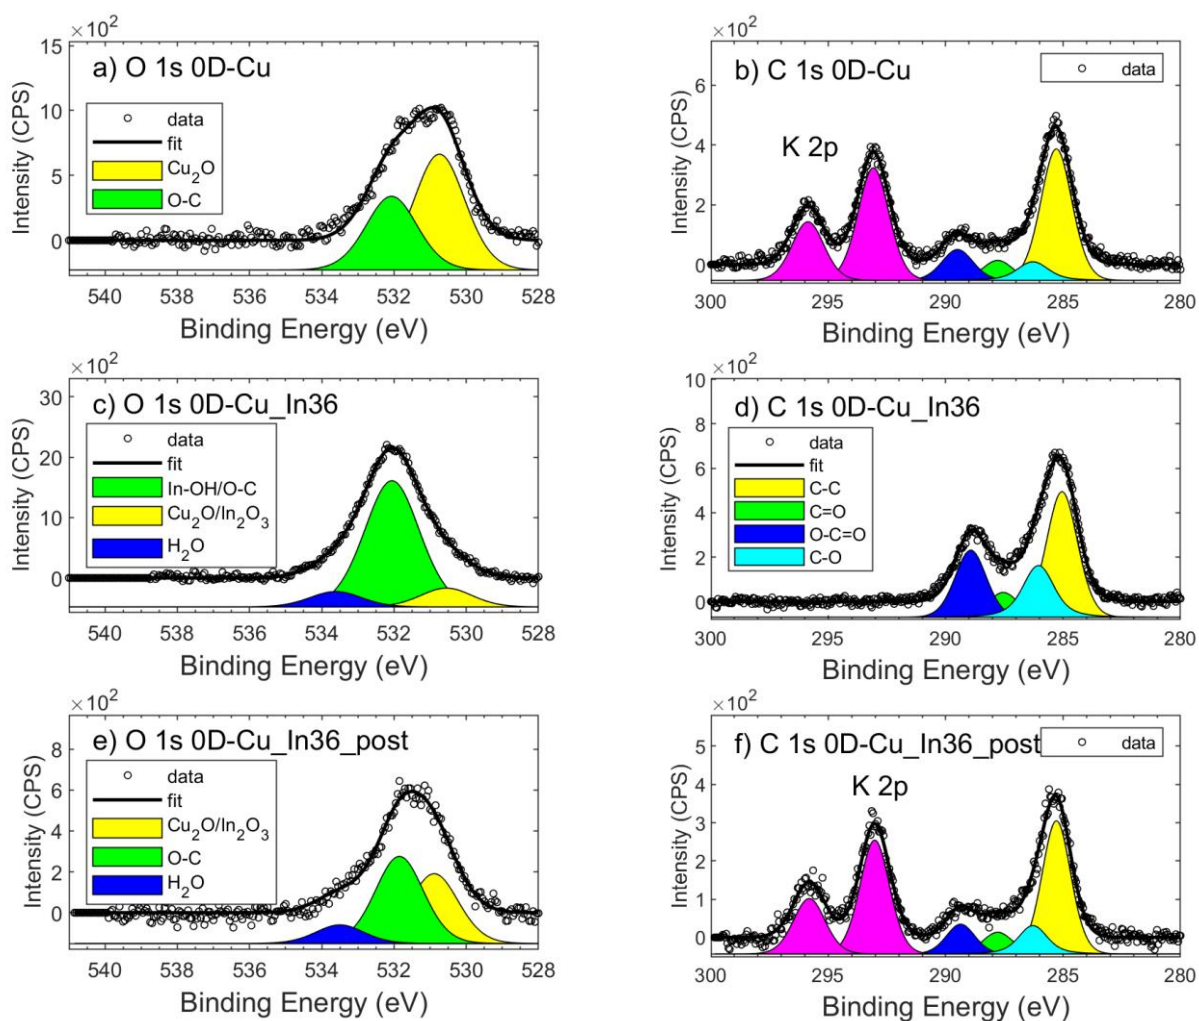

**Figure S2.** XPS signals of O 1s (a-c-e) and C 1s (b-d-f). K 2p signal was found only in OD-Cu and OD-Cu\_In36\_post (doublet in magenta). In (c) the In-OH/O-C peak considers both the contribution of oxygen in carbonate and the hydroxides forms of In (as well as of Cu).

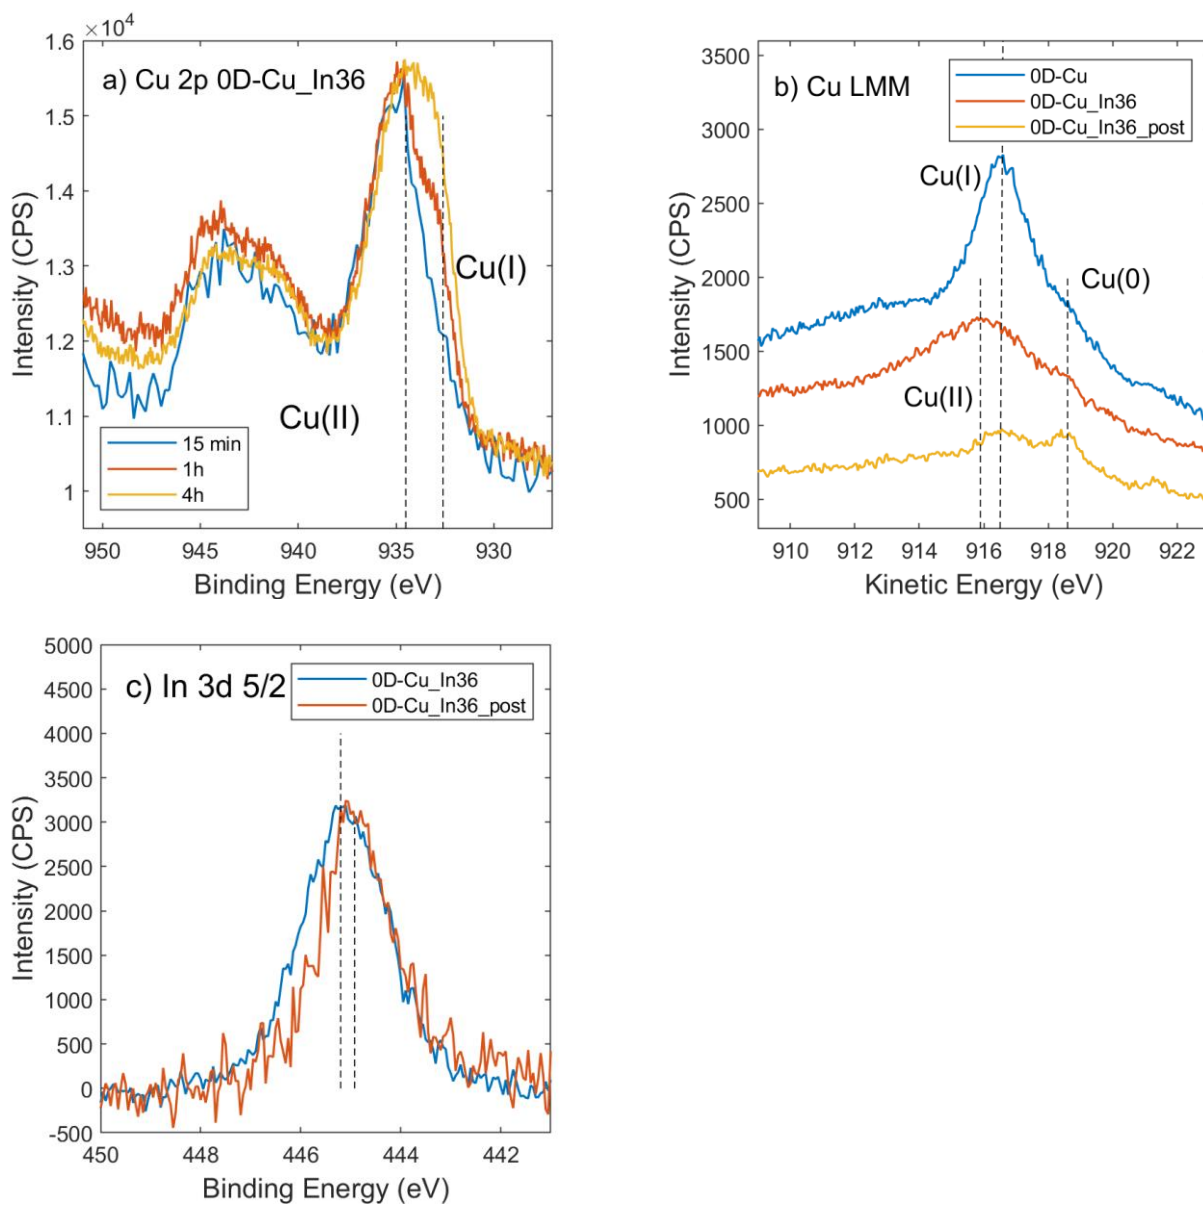

**Figure S3.** XPS signals of Cu 2p **(a)** as function of time, Cu LMM **(b)** and In 3d 5/2, where spectra were normalized and dotted lines at 445.2 eV and 444.9 eV were added **(c)**.

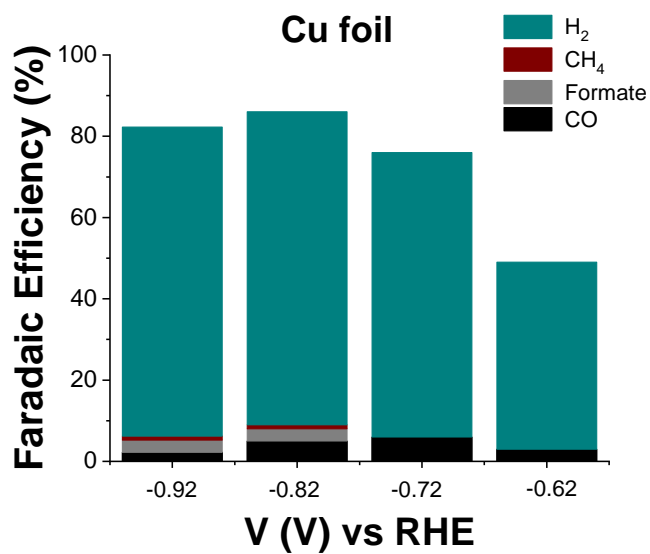

(a)

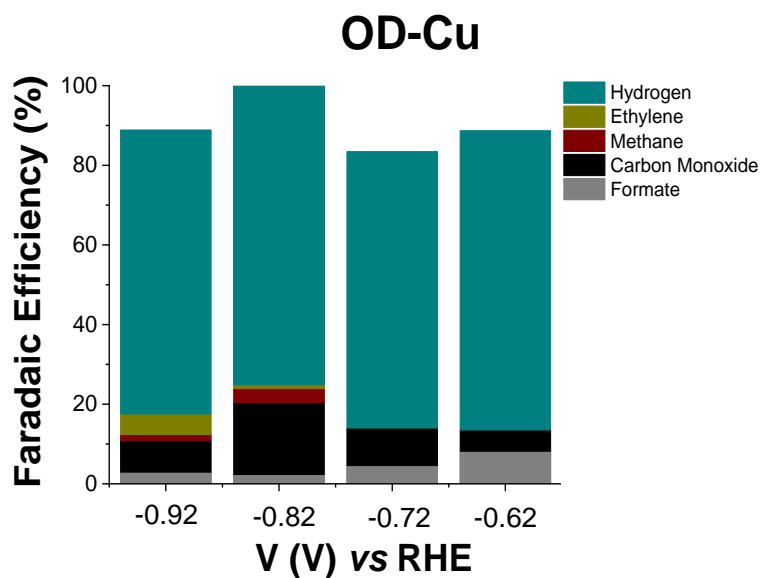

(b)

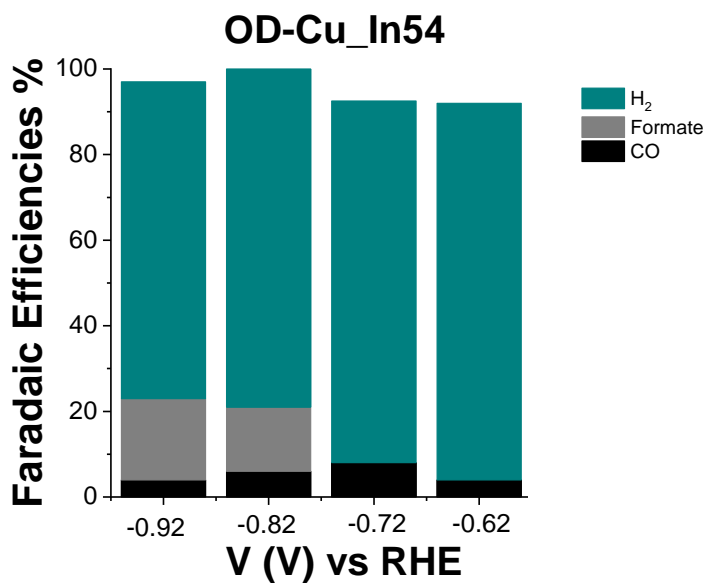

(c)

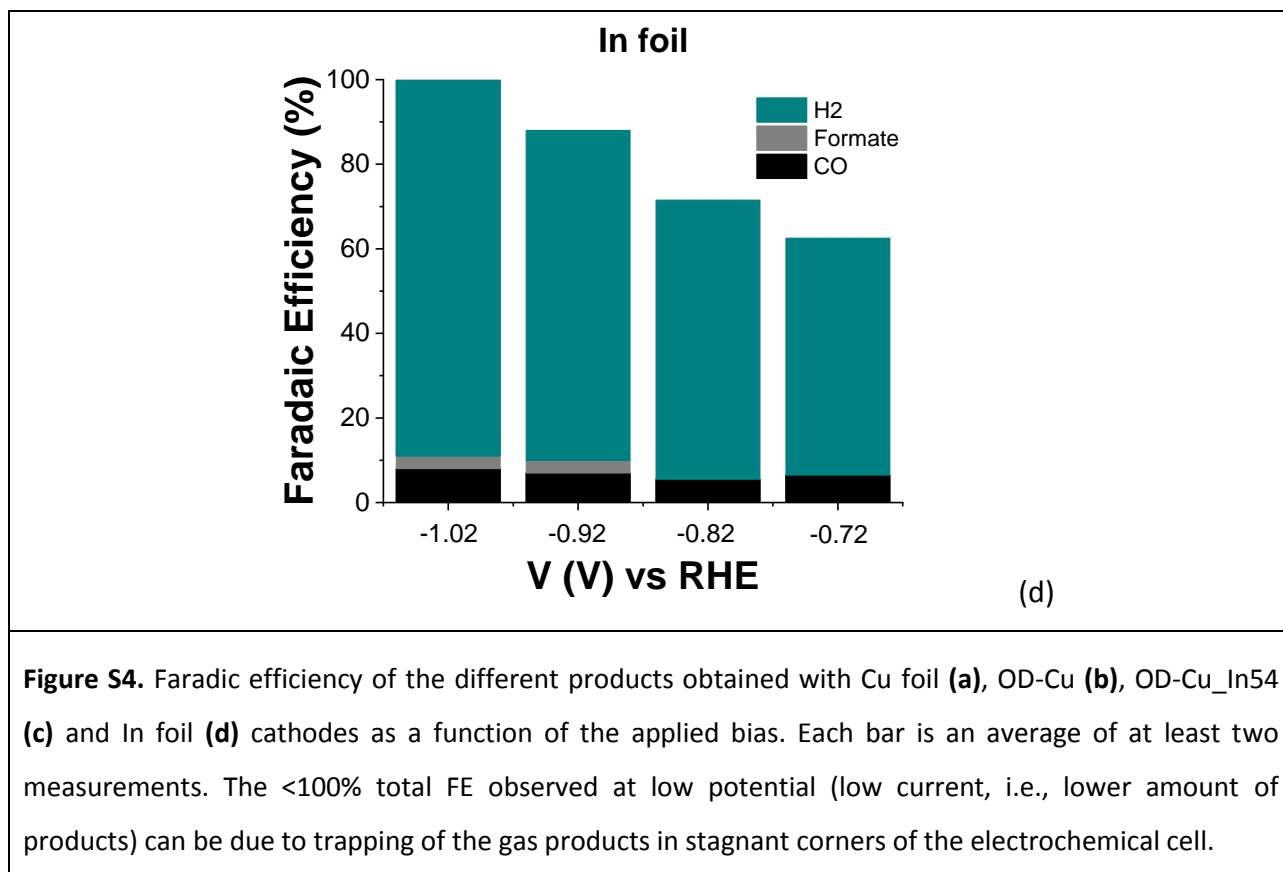

**Table S3.** Comparison of CO<sub>2</sub> reduction performance on different Cu-In catalysts.

| Synthesis                                                                                                            | Morphology                                                              | Phase(s)                                   | Products (% FE) <sup>a,b</sup>                                                                                                                                                                                                       | J <sub>max</sub>                                                  | Ref.      |
|----------------------------------------------------------------------------------------------------------------------|-------------------------------------------------------------------------|--------------------------------------------|--------------------------------------------------------------------------------------------------------------------------------------------------------------------------------------------------------------------------------------|-------------------------------------------------------------------|-----------|
| Reductive electrodeposition of In(NO <sub>3</sub> ) <sub>3</sub> on OD-Cu (obtained by fast square wave anodization) | Textured nanocubes (<1 μm)                                              | Cu/Cu <sub>2</sub> O + In(OH) <sub>3</sub> | @ -0.62 V vs RHE, <sup>c</sup><br>* For OD-Cu_In36: <u>syngas</u> (46% H <sub>2</sub> and 48% CO => H <sub>2</sub> /CO ratio ≈ 1)<br>* For OD-Cu_In18: <u>syngas</u> (59% H <sub>2</sub> and 29% CO => H <sub>2</sub> /CO ratio ≈ 2) | @ -0.62 V vs RHE:<br> J <sub>tot</sub>   > 3.5 mA/cm <sup>2</sup> | This work |
| Reductive electrodeposition of InSO <sub>4</sub> on OD-Cu (obtained by thermal oxidation)                            | Irregular grains (100-500 nm) from agglomeration of 50 nm nanoparticles | Cu <sub>11</sub> In <sub>9</sub> alloy     | @ -0.7 V vs RHE:<br><u>CO</u> (95%)<br>HCOOH (ca. 3%)<br>H <sub>2</sub> (<2%)                                                                                                                                                        | @ -0.7 V vs RHE:<br>J <sub>tot</sub> = -1.7 mA/cm <sup>2</sup>    | [1]       |



|                                                                                                                                                          |                                                                                                                           |                                                                                                               |                                                                                                                                                                                                                                                                                        |                                                                                                                 |     |
|----------------------------------------------------------------------------------------------------------------------------------------------------------|---------------------------------------------------------------------------------------------------------------------------|---------------------------------------------------------------------------------------------------------------|----------------------------------------------------------------------------------------------------------------------------------------------------------------------------------------------------------------------------------------------------------------------------------------|-----------------------------------------------------------------------------------------------------------------|-----|
| Near Infrared-driven decomposition of mixed metal precursors on Ti (different compositions obtained)                                                     | Nanoparticles (ca. 100 nm average diameter)                                                                               | * For $\text{Cu}_{0.75}\text{In}_{0.25}$ :<br>$\text{Cu}_2\text{In}$ phase                                    | @ -0.7 V vs RHE, <sup>d</sup> :<br>* For $\text{Cu}_{0.75}\text{In}_{0.25}$ :<br><u>CO</u> (80%)<br>$\text{H}_2$ (20%)                                                                                                                                                                 | @ -0.7 V vs RHE:<br>$J_{\text{CO}} \approx -2 \text{ mA/cm}^2$                                                  | [2] |
| In situ reduction of:<br>(a) $\text{CuInO}_2$ and<br>(b) $\text{In}_2\text{O}_3/\text{Cu}$<br>both deposited on carbon black                             | For both materials:<br>Structural evolution during $\text{CO}_2$ reduction                                                | Evolved catalyst (for both materials):<br>Cu core + $\text{In}(\text{OH})_3$ shell                            | For the evolved cat:<br>@ -0.6 V vs RHE:<br><u>CO</u> (55%)<br>$\text{HCOO}^-$ (ca. 5%)<br>$\text{H}_2$ (ca. 40%)                                                                                                                                                                      | @ -0.6 V vs RHE:<br>$J_{\text{CO}} \approx -1 \text{ mA/cm}^2$<br>$J_{\text{tot}} \approx -1.8 \text{ mA/cm}^2$ | [3] |
| Electrodeposition from $\text{In}_2(\text{SO}_4)_3 + \text{CuSO}_4$ on Au-sputtered Si. Different deposition potential results in different Cu/In ratios | Dendritic                                                                                                                 | * If In <25% → $\text{Cu}(111)$<br>* If ca. 38% In → $\text{Cu}_9\text{In}_4$ and $\text{Cu}_{11}\text{In}_9$ | @ -1 V vs RHE:<br>* For 40% In:<br><u><math>\text{HCOO}^-</math></u> (49%)<br>syngas (36% $\text{H}_2$ and 14% $\text{CO} \Rightarrow \text{H}_2/\text{CO}$ ratio = 2.6)<br>* For 80% In:<br><u><math>\text{HCOO}^-</math></u> (62%)<br>$\text{CO}$ (ca. 5%)<br>$\text{H}_2$ (ca. 25%) | @ -0.8/-1.1 V vs RHE:<br>$J_{\text{HCOO}^-} < -1 \text{ mA/cm}^2$                                               | [4] |
| $\text{Cu}(\text{OH})_2$ nanowires dipped in an $\text{InCl}_3$ solution + dehydration                                                                   | Nanowires (10 $\mu\text{m}$ av. length) with porous structure of Cu nanograins (10-30 nm) covered by a < 5 nm layer of In | Metallic Cu and metallic In                                                                                   | @-0.6 V vs RHE:<br>* For 20% In:<br><u>CO</u> (93%)<br>$\text{H}_2$ (ca. 4%)<br>$\text{HCOO}^-$ (ca. 3%)                                                                                                                                                                               | @ -0.6 V vs RHE:<br>$J_{\text{CO}} = -1.5 \text{ mA/cm}^2$                                                      | [5] |
| Electrochemical reduction of $\text{CuInO}_2$ deposited on carbon paper                                                                                  | Large particle aggregates with some small porosity                                                                        | $\text{Cu}_{11}\text{In}_9$ , $\text{Cu}_7\text{In}_3$ and Cu                                                 | @-0.8 V vs RHE:<br><u>CO</u> (70%)<br>$\text{HCOO}^-$ (19%)<br>$\text{H}_2$ (<10%)                                                                                                                                                                                                     | @-0.8 V vs RHE:<br>$J_{\text{tot}} = -2 \text{ mA/cm}^2$                                                        | [6] |

<sup>a</sup> Unless otherwise stated, all data are obtained in  $\text{CO}_2$ -saturated 0.1 M  $\text{KHCO}_3$  aqueous solution; <sup>b</sup> Main product underlined; <sup>c</sup> Data obtained in  $\text{CO}_2$ -saturated 0.5 M  $\text{KHCO}_3$  aqueous solution; <sup>d</sup> Data obtained in  $\text{CO}_2$ -saturated 0.5 M  $\text{NaHCO}_3$  aqueous solution.

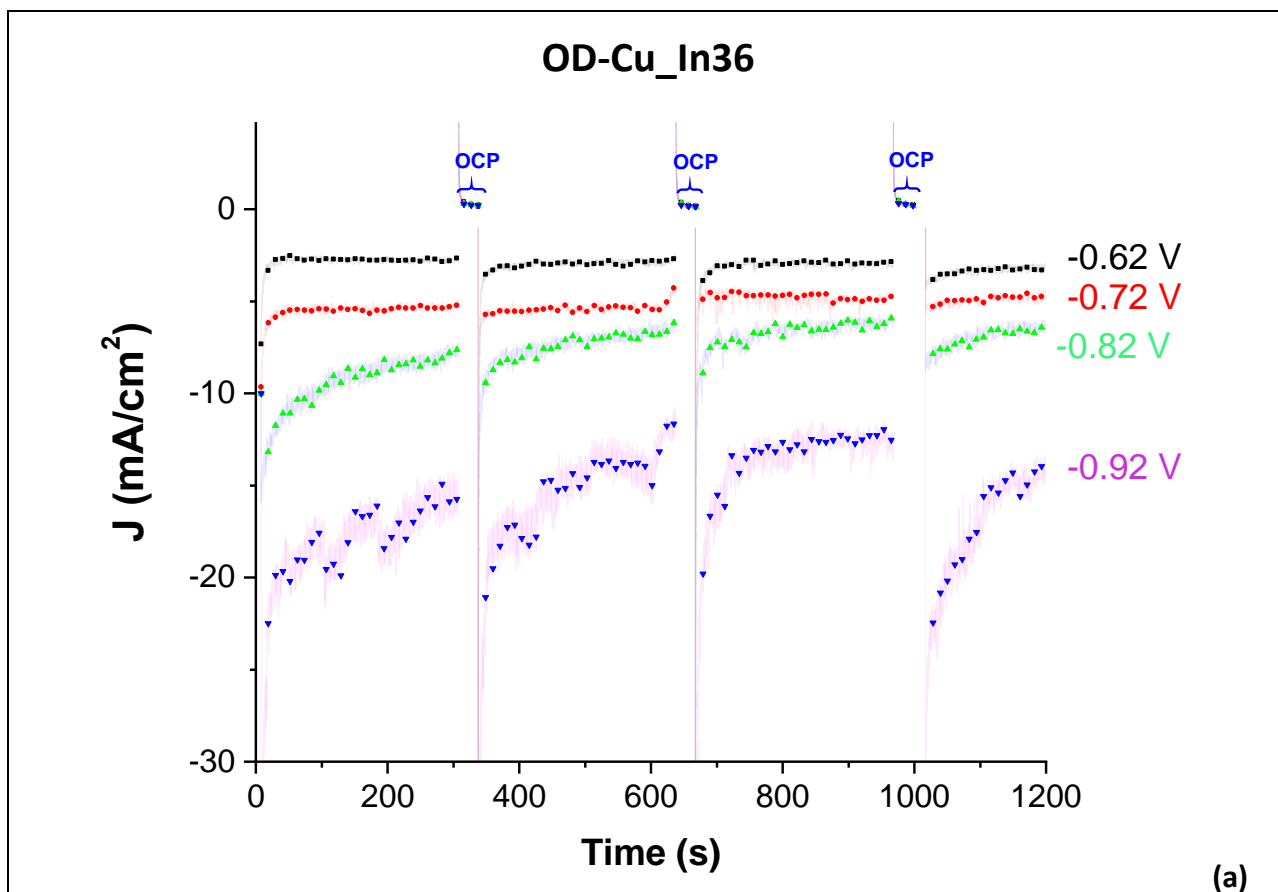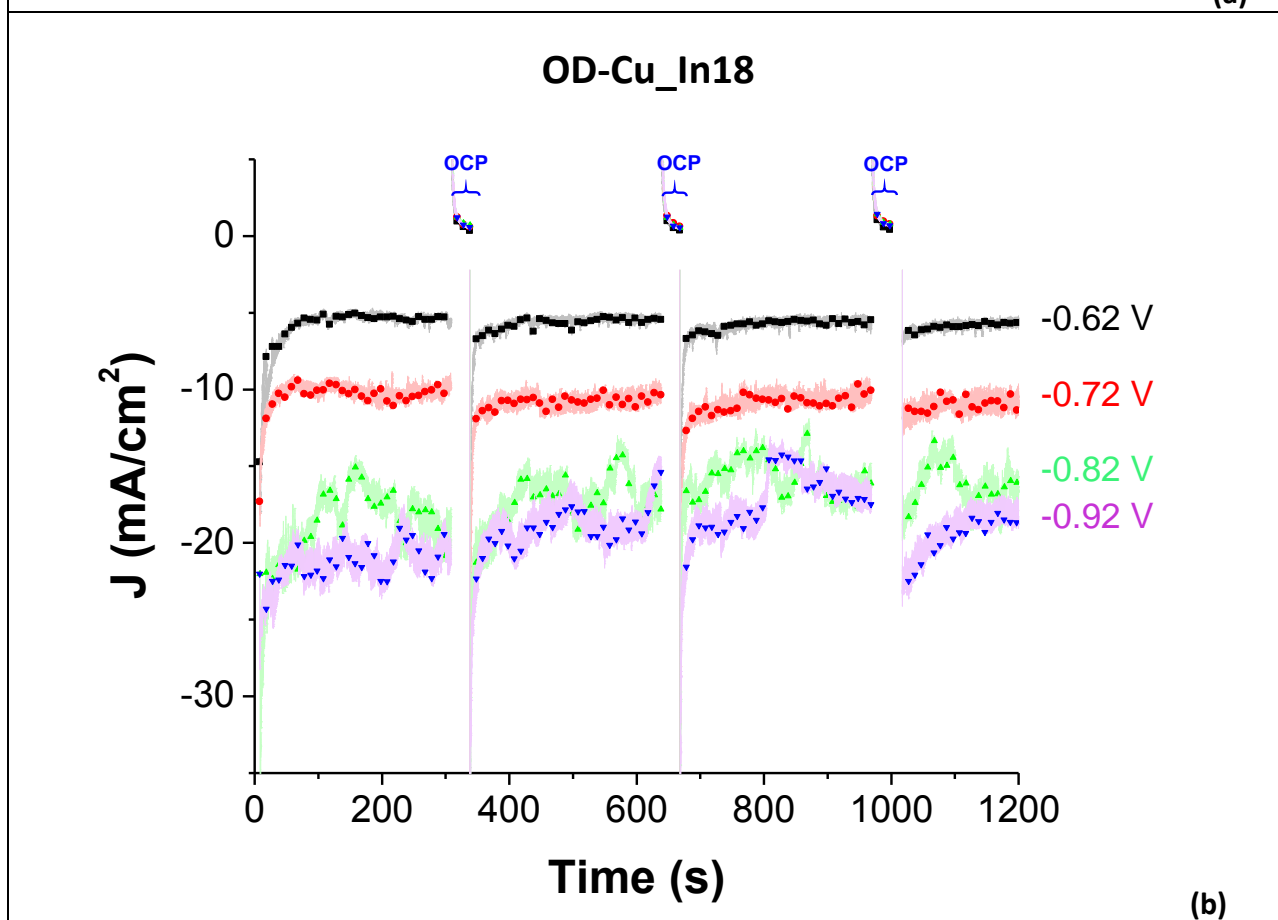

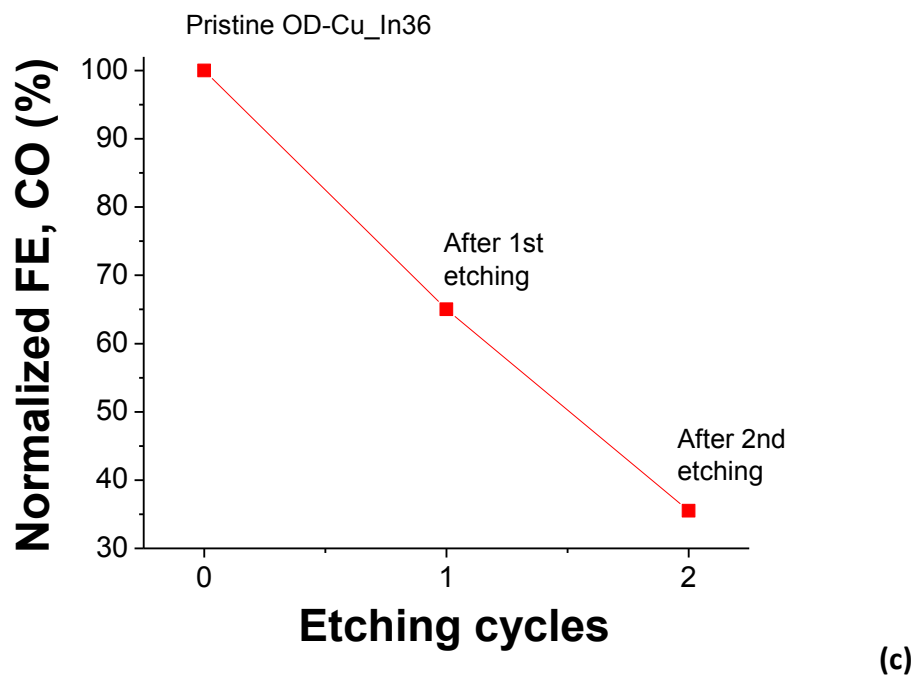

**Figure S5.** Stepped chronoamperometry experiments performed for the accumulation of the products obtained with OD-Cu\_In36 **(a)** and OD-Cu\_In18 **(b)**. In particular, the cathodes were stepped between the bias reported in the graphs (for 300 s) and the open circuit potential, OCP (for 40 s). **(c)** Faradaic efficiency for CO production for a pristine OD-Cu\_In36 compared with those of the same cathode after 1 or 2 etching cycles aimed at removing the  $\text{In}(\text{OH})_3$  phase. Each etching cycle consists in 15-min immersion of the cathode in 1 M  $\text{H}_2\text{SO}_4$  aqueous solution.

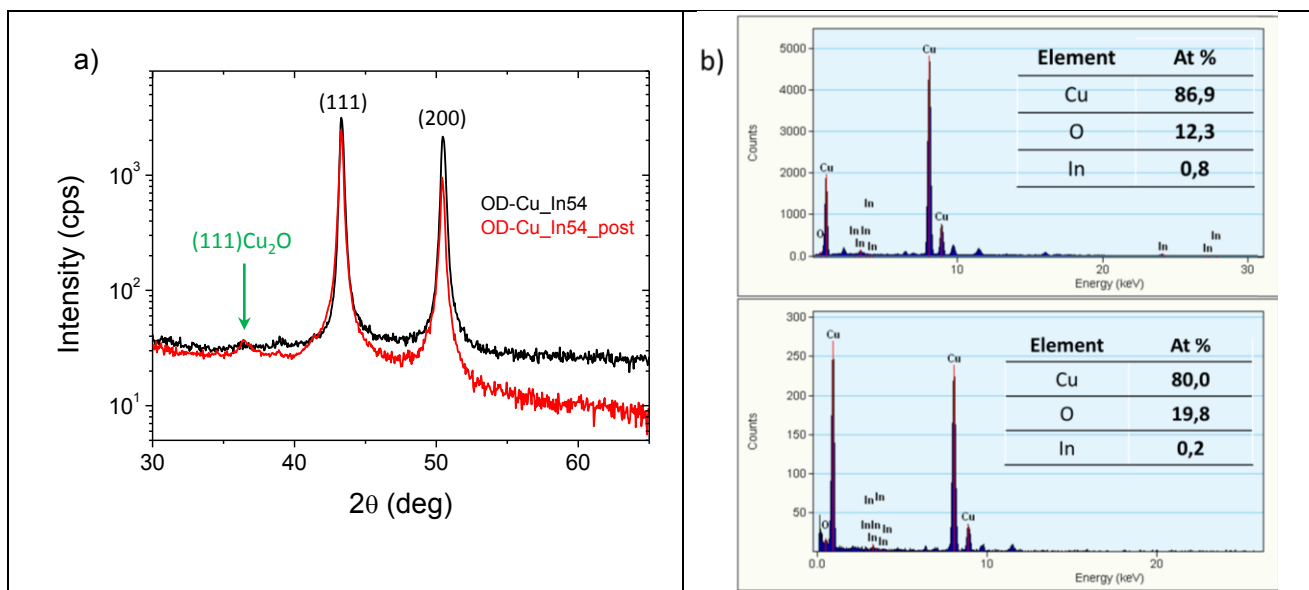

**Figure S6. (a)** Grazing-incidence X-ray diffractograms of OD-Cu\_In54 before (black trace) and after (red trace) CO<sub>2</sub>R experiments. **(b)** EDS spectra registered on a wide sample area identified by TEM, reporting relative Cu, O and In atomic content in the inset for OD-Cu\_In54 before (top) and after (bottom) CO<sub>2</sub>R experiments. Comparison based on OD-Cu\_In54 sample to enhance the role of In-deposition on the materials structure upon exposure to CO<sub>2</sub>R working conditions.

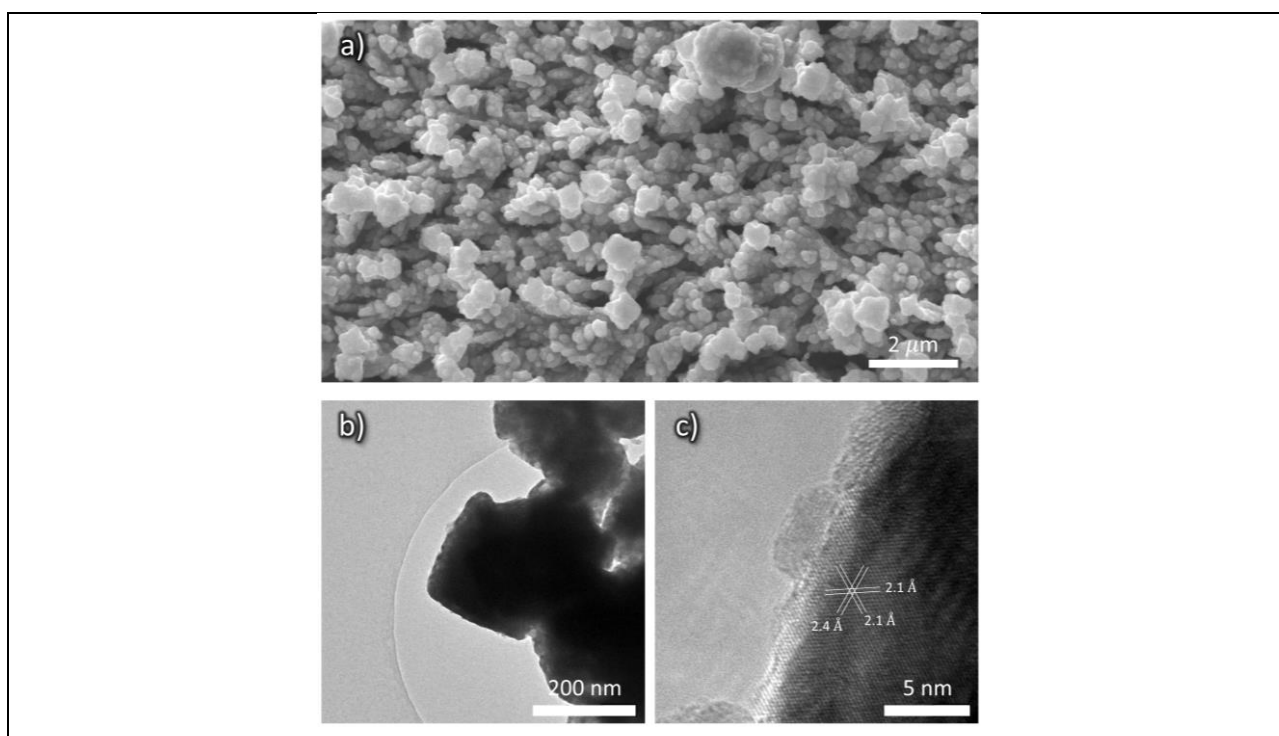

**Figure S7. (a)** SEM micrograph and **(b)** low or **(c)** high magnification HR-TEM micrographs of OD-Cu\_In54 after CO<sub>2</sub>R experiments. In the inset, d-spacing corresponding to lattice reflections compatible with Cuprite phase.

## References:

- [1] S. Rasul, D. H. Anjum, A. Jedidi, Y. Minenkov, L. Cavallo and K. Takanahe, *Angewandte Chemie*, 2015, **127**, 2174-2178
- [2] J. He, K. E. Dettelbach, D. A. Salvatore, T. Li and C. P. Berlinguette, *Angewandte Chemie*, 2017, **129**, 6164-6168
- [3] G. n. O. Larrazábal, A. J. Martín, S. Mitchell, R. Hauert and J. Pérez-Ramírez, *ACS Catalysis*, 2016, **6**, 6265-6274
- [4] Z. B. Hoffman, T. S. Gray, K. B. Moraveck, T. B. Gunnoe and G. Zangari, *ACS Catalysis*, 2017, **7**, 5381-5390
- [5] W. Luo, W. Xie, R. Mutschler, E. Oveisi, G. L. De Gregorio, R. Buonsanti and A. Züttel, *ACS Catalysis*, 2018, **8**, 6571-6581
- [6] A. Jedidi, S. Rasul, D. Masih, L. Cavallo and K. Takanahe, *Journal of Materials Chemistry A*, 2015, **3**, 19085-19092
